# Supplementary material for: Preparation and Carbonization of Glucose and Pyromellitic Dianhydride Crosslinked Polymers
Source: MDPI journal article supplement (doi:10.3390/c7030056), 2021-07-26
Supplement: s1 [file s1]

Archive with 1 entries (1 files):
- carbon-1268614-supplementary.pdf
