# Supplementary material for: Preparation and Carbonization of Glucose and Pyromellitic Dianhydride Crosslinked Polymers
Source: MDPI journal article supplement (doi:10.3390/c7030056), 2021-07-26
Supplement: s1 [file s1 › carbon-1268614-supplementary.pdf]

# Preparation and carbonization of glucose and pyromellitic dianhydride crosslinked polymers

Fabrizio Caldera<sup>1</sup>, Antonella Moramarco<sup>1</sup>, Federico Cesano<sup>1</sup>, Alessandro Damin<sup>1</sup> and Marco Zanetti<sup>1,2,\*</sup>

<sup>1</sup> *Department of Chemistry, NIS and INSTM Reference Centres, University of Torino, Via P. Giuria 7, 10125 Torino, Italy*

<sup>2</sup> *ICxT Centre, University of Torino, Lungo Dora Siena 100, 10153 Torino, Italy*

\* Correspondence: marco.zanetti@unito.it

## Supplementary Data

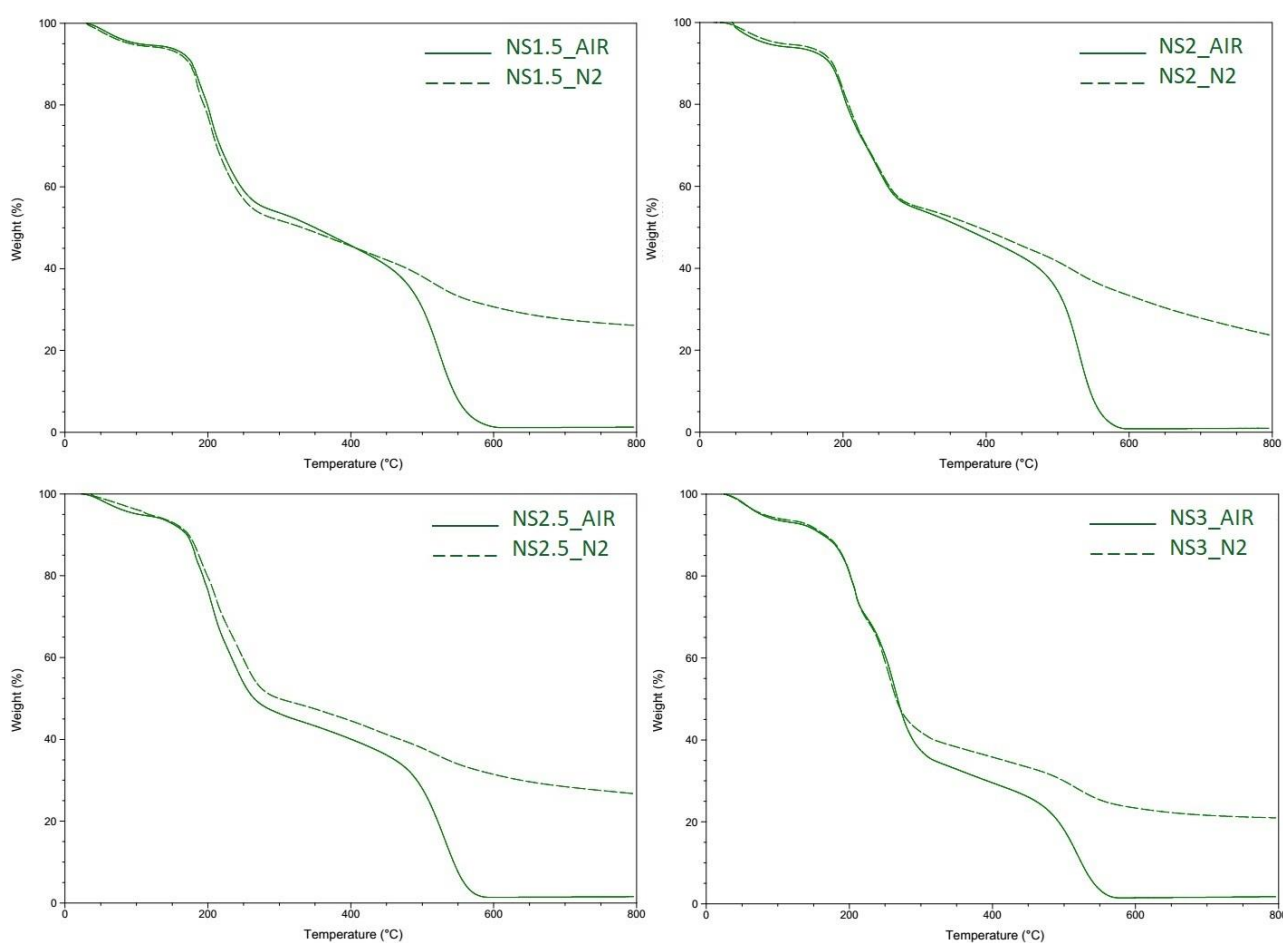

**Figure S1.** TG plots obtained under air or N<sub>2</sub> (solid or dotted lines, respectively) of NS1.5, NS2, NS2.5, NS3.

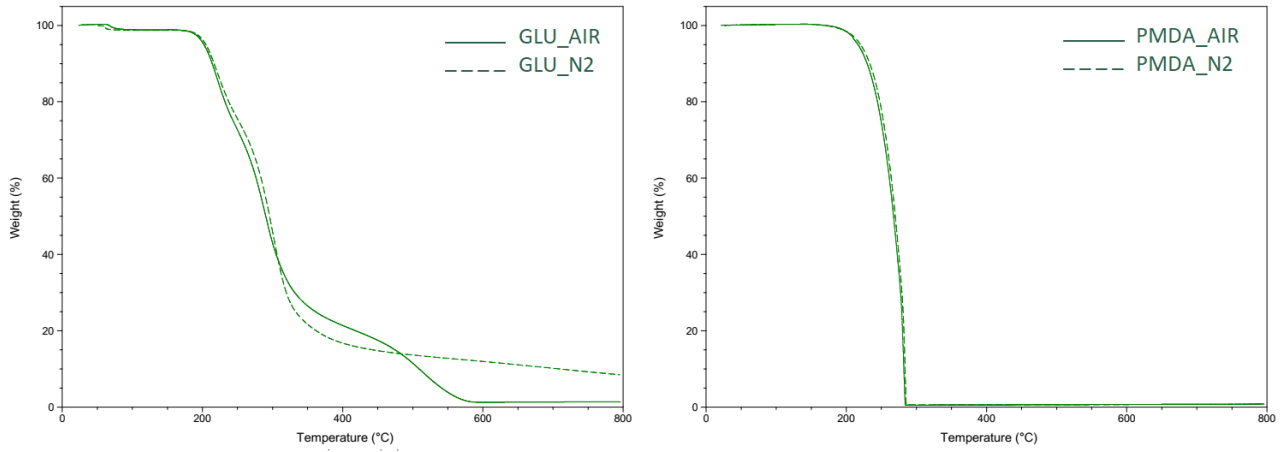

**Figure S2.** TG plots obtained under air or N<sub>2</sub> (solid or dotted lines, respectively) of GLU (left) and PMDA (right).

*S<sub>Langmuir</sub>, S<sub>BET</sub>, S<sub>micro</sub>, V<sub>micro</sub> determination methods of pyrolyzed porous materials*

#### 1). Langmuir and BET-plots and calculations of the S<sub>Langmuir</sub> and S<sub>BET</sub> [1]

$$\text{Langmuir equation: } \frac{P}{W} = \frac{1}{K W_m} + \frac{P}{W_m}$$

where P is the adsorbate equilibrium pressure, W and W<sub>m</sub> are the adsorbed weight and monolayer weights, respectively. K is a constant.

A plot of P/W vs. P gives a straight line with 1/W<sub>m</sub> as a slope for type I isotherms 0.05 ≤ P/P<sub>0</sub> ≤ 0.25 region

S<sub>Langmuir</sub> is calculated from the equation:

$$S_{Langmuir} = \frac{W_m \bar{N} A_{CS}}{\bar{M}}$$

where  $\bar{N}$  is the Avogadro's number (6,02 × 10<sup>23</sup>), A<sub>CS</sub> is the cross-sectional area of the adsorbate (16,2 Å<sup>2</sup> for N<sub>2</sub>),  $\bar{M}$  is the adsorbate molecular weight.

$$\text{BET Equation: } \frac{1}{W \left[ \left( \frac{P_0}{P} \right) - 1 \right]} = \frac{1}{W_m C} + \frac{C-1}{W_m C} \left( \frac{P}{P_0} \right)$$

where W is the weight of gas adsorbed, P/P<sub>0</sub> is the relative pressure, W<sub>m</sub> is the weight of adsorbate intended as a monolayer, C is the BET constant.

BET equation describes a linear plot, restricted to 0.05 ≤ P/P<sub>0</sub> ≤ 0.25 region of the N<sub>2</sub> adsorption isotherm, of 1/[W(P<sub>0</sub>/P)-1] vs. P/P<sub>0</sub> with  $\frac{C-1}{W_m C}$  and  $\frac{1}{W_m C}$  as slope and intercept, respectively.

The BET surface area is calculated from the slope and the intercept from the following equation:

$$S_{BET} = \frac{X_m \bar{N} A_{CS}}{M_v M}$$

Where  $\bar{N}$  is the Avogadro's number, A<sub>CS</sub> is the cross-sectional area of the adsorbate, M<sub>v</sub> is the molar volume (22414 mL), and M is the sample mass.

#### 2). Quantitative analysis of the S<sub>micro</sub> and Vol<sub>micro</sub> by means of t-plot method (Carbon Black STSA thickness equation)

The method evaluates the thickness of N<sub>2</sub> as an adsorbate layer as a function of P/P<sub>0</sub> with  $0.05 \leq P/P_0 \leq 0.35$ , as compared to non-porous material. From the linear curve extrapolated to the P/P<sub>0</sub> axis, V<sub>micro</sub> and S<sub>micro</sub> are determined as the intercept and slope, respectively.

$$\text{Carbon Black STSA thickness equation (t)} = 0,88 (P/P_0)^2 + 6,45 (P/P_0) + 2,98$$

#### References:

- [1] Lowell S., Shields J.E., Thomas M.A., Thommes M. (2004) Surface Area Analysis from the Langmuir and BET Theories. In: Characterization of Porous Solids and Powders: Surface Area, Pore Size and Density. Particle Technology Series, vol 16. Springer, Dordrecht. DOI: 10.1007/978-1-4020-2303-3\_5
- [2] ASTM D 6556-14 Standard Test Method for Carbon Black—Total and External Surface Area by Nitrogen Adsorption
